# Supplementary material
Source: ML conference proceedings conference paper supplement (https://proceedings.neurips.cc/paper_files/paper/2022/hash/6111371a868af8dcfba0f96ad9e25ae3-Abstract.html)
Supplement: Supplementary file 1 [file 6111371a868af8dcfba0f96ad9e25ae3-Supplemental-Conference.zip]

Archive with 2 entries (2 files):
- camera_supp/camera_supp.pdf
- camera_supp/Code_NetworkLDPcpt.R
